# Supplementary material
Source: publisher figshare collection journal article supplement (https://osapublishing.figshare.com/ndownloader/files/14624297)
Supplement: Supplementary file 1 [file 14624297]

#Parameters of ¦Èi of optimized sub-DOEs for nine foci modulation. unit:rad
#Corresponding to data used for Fig.6 in the manuscript
#Note : Column i-¦Èj refers to the parameter of ¦Èj in sub-DOE-i
ratios	1-¦È1	1-¦È2	2-¦È1	2-¦È2	2-¦È3	2-¦È4	3-¦È1	3-¦È2	3-¦È3	3-¦È4	4-¦È1	4-¦È2	5-¦È1	5-¦È2	6-¦È1	6-¦È2
2:1:1:1:1	0.2678	1.13	0.2651	0.7494	0.8197	0.8577	0.0785	0.1722	0.2673	1.2013	0.16	0.175	0.0805	0.4148	0.1637	0.6486
3:2:2:1:1	0.2638	1.1194	0.26	0.7515	0.8145	0.8437	0.1147	0.1843	0.1904	1.1983	0.1131	0.2358	0.071	0.4048	0.2357	0.6493
4:3:3:2:1	0.2943	1.1023	0.3684	0.7384	0.8023	0.8352	0.0865	0.1341	0.1356	1.1804	0.0154	0.224	0.2399	0.2543	0.2934	0.6192
